# Supplementary material
Source: ML conference proceedings conference paper supplement (https://openreview.net/forum?id=4j4qVy8OQA1)
Supplement: supplementary_material [file attachment]

# A KOOPMAN APPROACH TO UNDERSTANDING SEQUENCE NEURAL MODELS— SUPPLEMENTARY MATERIAL

**Anonymous authors**

Paper under double-blind review

## A UNIGRAM AND BIGRAM HIGHLIGHTING IN SENTIMENT ANALYSIS

Several examples of reviews in which the positive and negative unigrams are highlighted by the projection magnitude of the hidden states are shown in Fig. 1. In particular, we note the first negative review, where the network decreases the projection magnitude when it identifies a positive word (*excellent*), and the magnitude increases significantly when the word *bad* appears. To further assess the eigenvectors role in identifying positive and negative unigrams in the reviews, we perform the following statistical evaluation. We employ a Bag Of Words (BOW) algorithm on the vocabulary to classify the sentiment on the word level. Using the BOW classification, we extract the positive and negative words from each review, and we compute how many of these words attain high projection magnitude values. Specifically, given a batch  $H$ , we compute the following averages

$$a_p(H) = \frac{1}{|T_p|} \sum_{t \in T_p} \lfloor s(1, h_t) \rfloor, \quad a_n(H) = \frac{1}{|T_n|} \sum_{t \in T_n} \lfloor s(3, h_t) \rfloor, \quad (1)$$

where  $s(j, h_t) = |\hat{h}_t(j)| \in [0, 1]$  is the projection magnitude of the state  $h_t$  onto the eigenvector  $u_j$ ,  $T_p$  and  $T_n$  are the indices of positive and negative elements, respectively, and the operator  $\lfloor \cdot \rfloor$  rounds a number to the closest integer. Thus,  $a_p(H)$  and  $a_n(H)$  hold the average of positive and negative words whose projection magnitude is at least .5 or higher. Consequently, we can view Eq. (1) as the percentage of identified positive and negative unigrams. We show in Fig. 5 histograms of  $a_p(H)$  and  $a_n(H)$  over the entire test set. We find that on average, 62.3% and 74.0% of the positive and negative words, respectively, are identified correctly by the eigenvectors. These statistics support and reinforce our observation about the role of the eigenvectors in counting positive/negative words.

## B THE CASE OF GENERAL $n$ -GRAMS FOR $n > 2$

In addition to unigram and bigram highlighting, we also consider KANN in the general case of  $n$ -grams where  $n > 2$ . We note that  $n$ -grams with large  $n$  are less common in sentiment analysis, both from a semantic perspective (what would a 5-gram mean?) and also from a statistics viewpoint (e.g., even 2-grams are scarce in the IMDB dataset). Nevertheless, we would like to show in the following that KANN indeed extends to the general case, and we test our method on 3-gram phrases. To this end, we created a batch of 3-grams by adding amplifiers to 2-grams, e.g., “not bad” was changed to “not extremely bad” or “not very bad” and etc., and we repeated our analysis. Specifically, we extract a batch  $H \in \mathbb{R}^{k \times n \times m}$  and obtain an operator  $C$ . Then, we project the batch on the eigenvectors as described in Eq.(10) for each  $j$  eigenvector of  $C$  while we sum over time and average over batch:

$$\xi_j(H) = \frac{1}{k} \sum_{h \in H} \sum_{t \in T_h} s(j, h_t) \quad (2)$$

where each  $h \in H$  is a sequence of hidden states corresponds to an example in the batch,  $k$  is the size of the batch and  $T_h$  are the indices of the sequence. We sort  $\xi(H)$  from high to low values to better visualize the importance of the Koopman eigenvectors and their ordering. We plot the resulting graph in Fig. 2 where a hierarchical behavior is shown, and each group of eigenvectors have a different role. The first group with labels  $[3, 2, 4, 5]$  with the highest projection values captures 1-grams as discussed in the main text. The second group with labels  $[6, 7]$  encodes 2-grams, and the third group with labels  $[10, 9]$  encodes 3-grams as we show in Fig. 3. Specifically, using the same

method we described in the main text, we obtain highlighting of 3-gram components in the review when projected onto eigenvector 10. Importantly, in our analysis on 3-grams we did not re-train the network. Rather, we simply created a batch with 3-gram components and analyzed the results obtained with KANN.

## C SHUFFLED REVIEWS

We will consider the following two reviews: “not bad and very good” and “very bad and not good”. These reviews serve as a great example to understand the behavior of the network as they contain the same words in a different order, and the overall meaning is opposite. Considered from a linear dynamical systems viewpoint, these reviews seem to pose a challenge: given that the tokens are the same but in a different order, how will a linear system be able to distinguish between them? Indeed, assuming a linear system in the space of tokens would be problematic in this case. However, we would like to emphasize that our main claim in the paper is that the dynamics in the *latent space* are sufficiently linear to allow for Koopman analysis. As the network is recurrent and nonlinear, and the tokens are processed one-by-one, the above reviews can be distinguished in practice while not breaking the linearity in the latent space. Specifically, each of these reviews is embedded completely differently. The first example starts with the word “not”, whereas the second example starts with the word “very”. In practice, the network embeds these latent states in completely different locations of the latent space. Moreover, the embedding of the other states are related to the initial locations. Thus, in practice, the network has two completely different trajectories for the example reviews in discussion. From a (linear) dynamical systems perspective, we have two trajectories of different initial conditions. Such cases can be typically differentiated and identified using linear dynamical systems.

To show it numerically, we generated these two reviews (five words each), and we repeated our analysis. Specifically, we projected their latent trajectories (as obtained from the network) onto the first two dominant PCA modes (as was done in Maheswaranathan et al. (2019)), and we report the obtained paths in Tab. 1. Keeping in mind that the network is mostly one-dimensional in a PCA representation, the above paths clearly show that the reviews are correctly classified. Namely, the first review starts in the negative part of the  $x$ -axis ( $-0.716$ ) and finishes in the positive part of the  $x$ -axis ( $0.713$ ). In comparison, the second review starts in the positive part of the  $x$ -axis ( $1.478$ ) and finishes in the negative part of the  $x$ -axis ( $-0.572$ ). Computing the paths using our KANN representation via the matrix  $C$ , we obtain the paths reported in Tab. 1. While the values are different (as our linear approximation exhibits some error), the initial positions and trend are the same for the nonlinear representation and our Koopman linear representation. In particular, the trajectories end on the same side of the  $x$ -axis for each review, exactly as we have in the nonlinear network.

| Time    | “not bad and very good” |                   | “very bad and not good” |                   |
|---------|-------------------------|-------------------|-------------------------|-------------------|
|         | Network                 | KANN              | Network                 | KANN              |
| $t = 1$ | $(-0.716, 0.547)$       | $(-0.284, 0.649)$ | $(1.478, 0.355)$        | $(1.094, 0.522)$  |
| $t = 2$ | $(-1.080, 0.280)$       | $(-0.589, 0.612)$ | $(0.313, 0.078)$        | $(0.128, 0.619)$  |
| $t = 3$ | $(-0.440, -0.093)$      | $(0.003, 0.479)$  | $(0.392, -0.282)$       | $(0.335, 0.503)$  |
| $t = 4$ | $(0.807, -0.319)$       | $(0.708, 0.419)$  | $(-0.895, -0.311)$      | $(-0.530, 0.571)$ |
| $t = 5$ | $(0.713, 0.036)$        | $(0.598, 0.474)$  | $(-0.572, -0.291)$      | $(-0.237, 0.542)$ |

**Table 1:** The nonlinear network as well as our linear representation are able to differentiate between the reviews “not bad and very good” and “very bad and not good”, and to correctly classify them. Specifically, we show the trajectories of the hidden states as obtained from the network and our method when projected to the first dominant PCA modes. The results above show similar initial conditions and trend, i.e., both start and end on the same side of the  $x$ -axis. We conclude that the network learns a representation which is sufficiently linear in the latent space, allowing to methods such as ours to expose its dynamics.

## Positive unigram reviews:

a touching movie. it is full of emotions and wonderful acting. i could have sat through it a second time.

an excellent " #sle #ep #er" of a movie about the search for carlos the international assassin #. am surprised this film didn't tra #ke in \$100 ##-million ##- #plus because it's much better than most films that do so. rent it now.

this movie has everything typical horror movies lack ##. although some things are far fetched we are dealing with quality snow man engineer #s. the only preview i can reveal is that i cant wait for jack ##zilla ##. dare i say oscar winner. this is a perfect date movie. i advise all men for a nice romantic surprise see this movie with that special person.

## Negative unigram reviews:

jean ##- ##hugh ang ##lade is excellent as the teenage ##d boy who wants to be a whore to please the man he loves, but the rest of this film is so bad ##-a #cting ##, writing, cinematography, and everything else ##- that ang ##lade #'s performance is wasted. sad to see so fine an actor in such a garbage flick.

one of the most boring movies i've ever seen. three immature young people have sex and talk about very little except the ir "love" of each other. they don't seem to be interested in much but each other, and only passive ##ly so. i was left feeling shut out. most of the exterior scenes take place at night, so one can't even enjoy well- ##lit sights of paris ##! i gave up after an hour and ten minutes.

this movie stunk. there is not much more to it. the final fight looked like walker taking on my grandmother, not some supernatural demon with the strength of ten men. i found the commercials more interesting. the plot twists and jokes could be seen coming a mile away. the only redeeming quality of this film was that it ended. avoid this at all costs. ##.. ## unless you enjoy bad chuck norris movies.

## Bigram reviews:

cheesy 80's horror co-starring genre f ##av ##s ken fore ##e and rosaling cash along with brenda b ##ak ##ke are some of the featured players in this tale about a haunted health club. goofy dialogue and some nasty gore effects make this movie watchable. not bad but no great shakes either. <br /><br /> recommended for the bad dialogue and acting. b-movie fans only. ##<br /><br /> ##b

i'm not a sports fan - but i love sports f ##lic ##s! so, why... what is a great sports f ##lic... this one. and the storytelling style, is very fine. <br /><br /> if you are looking for a re ##lia ##bly fantastic 2 hours of entertainment, "great #est game" qualifies might ##ily ##. here is a movie that moves. bill paxton has gone to the same director school as ron howard - a.k.a. richie cunningham ##, "happy days" ##. that is not bad. look at the immense body of fine work that ron did after moving behind the camera. <br /><br /> ##bi ll like ron was a great actor, but will be a superstar director if "great #est game ever ##" is the indication of things to follow. <br /><br /> ##wonderful cinematography - fantastic direction - fine acting, especially by elias k #ote ##as, s ##hia le ##be ##ou ##f, mar ##nie mc ##ph ##ail ##, josh f #lit #ter, stephen marcus ##. justin ash ##for ##th. # <br /><br /> this is a must see film not just as "feel ##-good ##", nor " ##sp #ort ##s film" ##, this is very good cinema.

not bad performances. whoopi plays the wise ##/ ##war ##m role quite well. still, the storyline and situations can not be believed (for #ced pc stereotypes ##). at times it is good Jews and blacks vs. the evil white christians ( #ho ##- #hum ##). a typical hollywood fantasy. the film does have its moments, but it is not one that i would recommend to go out of your way to view.

i hated the first movie is really boring and we only get see the o #ct #op #us at the end. <br /><br /> the plot dead bodies are being found in the new york harbor ##. the police have no clues nor suspects until nick and his colleague realize the killer is a giant o #ct #op #us. everybody, especially the police captain, refuses to believe nick's story, and soon the harbor will be filled with boats for the 4th of july celebration #s... ##<br /><br /> in this movie we get to see more of the giant o #ct #op #us and special effects for this movie are really good for it's time. <br /><br /> the acting is this movie not bad but not great too but okay and watchable ##. <br /><br /> there are some really cheese scenes to movie but if can get past that, you should enjoy the rest of movie. <br /><br /> ##5/10

Figure 1: Several examples of highlighted unigrams and bigrams.

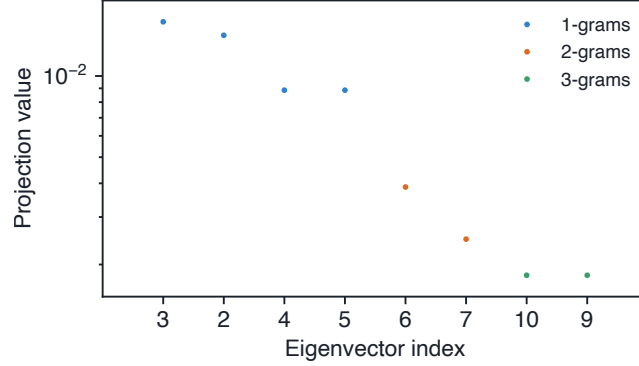

Figure 2: Projecting the batches of reviews onto the Koopman eigenvectors as specified in Eq. (2) reveals a hierarchical ordering where subspaces of eigenvectors attain different roles. In particular, the first group of eigenvectors colored blue and with indices [3, 2, 4, 5] highlights 1-grams. Similarly, the second group of eigenvectors with the orange color and indices [6, 7] identifies 2-grams. Finally, the last group in green with indices [10, 9] highlights 3-grams. We note that a similar structure was identified across different batches.

not very bad performances. whoopi plays the wise ## / ## war #  
 #m role quite well. still, the storyline and situations can  
 not be believed (for ## ced pc stereotypes ##). at times it i  
 s good jews and blacks vs. the evil white christians ( ## ho  
 ## - ## hum ##). a typical hollywood fantasy. the film does ha  
 ve its moments, but it is not one that i would recommend to  
 go out of your way to view.

perhaps the best movie ever made by director kevin ten #ne  
 (well, his witch ## board is not on the top of my all-time h  
 orror list ##), this one is a strange, fascinating mixture b  
 etween pin and child's play, both better than this one, but  
 not so better. sure, the plot is contrived and perhaps too p  
 redictable, but the actors are good. rosalind allen is very  
 pleasant to the eye (and so is can ## dance mckenzie - god bl  
 ess her for the shower scene! ##), the child actress is very  
 good in interpret ## ing the disturbed daughter and the pin  
 #o ## c ## chio puppet is scary enough to give you a few thri  
 lls down the spine ##. for a b-movie not extremely bad at al  
 l.

steven seagal played in many action movies. most of them wer  
 e bad but not extremely bad as the patriot ##. this one is a  
 z ## - series action low-budget movie. after operation delta  
 force, act of war, the substitute 2, p #la #to's run, the  
 base, drive, sabotage ##, etc comes the patriot ##. now stev  
 en seagal is sure to be considered as a bad actor like mark  
 dascascos ##, jean-claude van damme, treat williams, jack s #  
 #cal #ia, gary busey ##, chuck norris ##, michael madsen an  
 d many others. the scenario was full of holes and the charac  
 ters were not realistic (maybe because of the very bad actor  
 s) and the 4. ## 25 bucks you spend by renting the patriot ar  
 e called lost money! ##!! i give it 0 ## and a half ## ( for l  
 aughs ##) out of 5.

mary, mary. bloody mary is an ok time killer. it has a unifor  
 mly attractive cast, the action is rarely dull. there are a  
 lot of killings. and the production values are not extremel  
 y bad. but in the end, it plays like a standard tv episode f  
 rom the 1970s with some nudity thrown in. the film is the en  
 d product of an "a ## #or" trying to make a purely comme  
 rcial film. there's very little depth here and the film spen  
 ds too much time with chases and action scenes. except for t  
 he scene on the beach with the old man, m ## mb ## m is almos  
 t devoid of any scares or suspense or dread ##. the director  
 has very little understanding of the horror genre. <br /> it's watchable even though it doesn't leave a lasting impr  
 ession.

Figure 3: Projecting the hidden states to eigenvector 10 highlights 3-gram components, similarly to the highlighting of 1-grams and 2-grams in Fig. 1.

## D PROJECTING NORMAL BEAT SIGNALS ONTO PCA COMPONENTS

In Sec. 4.2 in the main text, we discover that the dominant Koopman eigenvectors are capable of identifying the salient features in the beat signals (marked by dashed black lines in Fig. 4). To compare our results with PCA and KernelPCA (using `rbf` kernel), we now repeat the same experiment, but instead of projecting onto Koopman modes, we project the hidden states  $H$  to the first four PCs and first four eigenvectors of the centered kernel matrix respectively. We provide both qualitative and quantitative comparison with both methods. Fig. 4 shows the resulting graphs, clearly demonstrating that PCA and KernelPCA fail to encode the dynamics. In Tab. 2 we provide a quantitative comparison of our method to PCA and KernelPCA. Specifically, for every method, we compute the mode with the minimal distance to the salient features located at times  $t = 3$ ,  $35 \leq t \leq 75$ ,  $t = 103$  and  $t = 133$ . The results clearly show that KANN attains the lowest error for each of the salient features.

| Method      | $t = 3$       | $35 \leq t \leq 75$ | $t = 103$     | $t = 133$     |
|-------------|---------------|---------------------|---------------|---------------|
| PCA         | 1.5817        | 1.2197              | 0.3356        | 1.1685        |
| KernelPCA   | 0.0762        | 1.1045              | 0.4095        | 0.7217        |
| <b>KANN</b> | <b>0.0317</b> | <b>0.5107</b>       | <b>0.1724</b> | <b>0.0871</b> |

Table 2: For every salient feature at times  $t = 3$ ,  $35 \leq t \leq 75$ ,  $t = 103$  and  $t = 133$ , we compute the distance between the signal and its reconstruction using the principal modes of PCA, KernelPCA and KANN. Our approach exhibits the minimal error in comparison to PCA and KernelPCA.

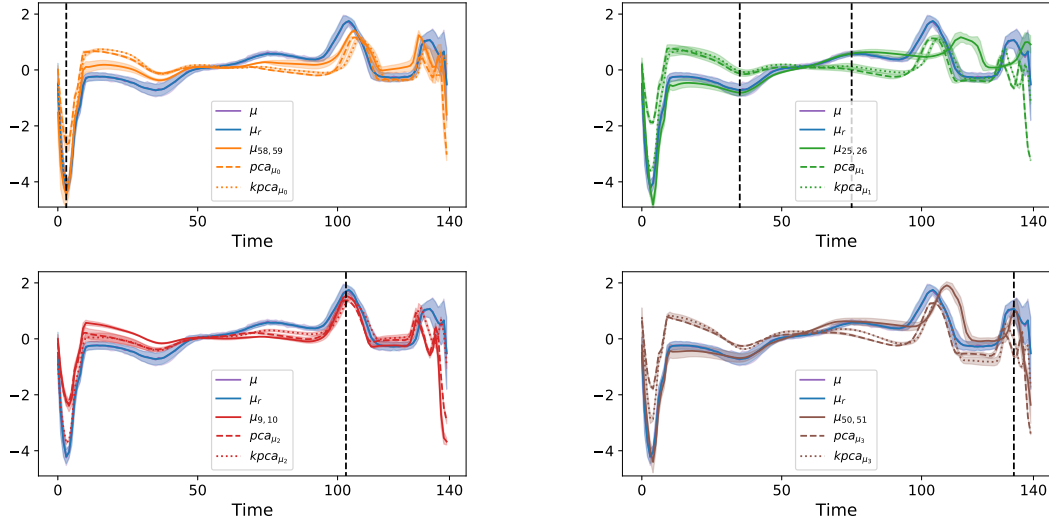

Figure 4: We show the first four principal modes of KANN (solid lines), PCA (dashed lines), and KernelPCA (dotted lines). The above graphs show that our method is better at matching the salient features of beat signals which are marked by black dashed lines in comparison to PCA and KernelPCA. We conclude that the network mainly focuses on reconstructing these salient features, allowing the user to easily distinguish between normal and anomalous beats during post-processing.

## E DIFFERENT BASIS AND NETWORK ARCHITECTURES

**Choice of basis.** We will now demonstrate the robustness of our approach to the choice of basis. The first step to computing the matrix  $C$  involves the projection of the given states onto a basis. In our work, we mostly experimented with the truncated SVD modes obtained by decomposing the hidden states tensor. In what follows, we additionally show that the principal component analysis (PCA), and Fourier transform (FFT) bases lead to quantitatively similar results on the sentiment

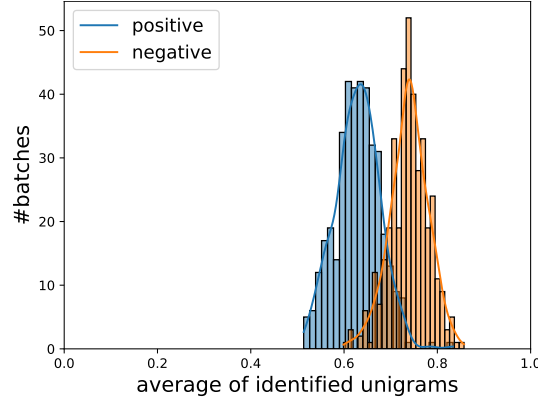

Figure 5: The above histograms show the average percentage of identified positive (blue) and negative (orange) unigrams per batch. It follows that negative words are better identified by the network (74.0%) in comparison to positive words (62.3%).

analysis task. We note that while the bases are linear in terms of projection, SVD and PCA are data-driven, whereas FFT is data-agnostic, i.e., the basis elements are independent of the data. First, we compute the relative error as in Sec. 4.4, and we obtain 0.0347, 0.0347, 0.973 for SVD, PCA, and FFT, respectively. The somewhat poor result of FFT is expected, as it is data-agnostic. Second, we compare the dominant eigenvalues of the different  $C$  matrices computed using the bases. It follows that across all bases, the dominant eigenvalues correspond to one another. In particular, the average error between corresponding eigenvalues is 0.003 for PCA, and 0.02 for FFT, when measured from the eigenvalues of SVD. We additionally plot the dominant eigenvalues in Fig. 7 where the  $x$ -axis is the real part, and the  $y$ -axis is the imaginary part. Finally, we also show how the dominant eigenvectors have the same semantic role in highlighting the positive words in the same review. Indeed, we show in Fig. 6 that the positive words obtain large projection magnitudes in all bases. See the words e.g., amazing, special, good. Overall, the results show robustness to linear bases.

Using SVD:

```
watched this on k ##q ##ed, with frank baxter commenting ##,
as i recall ##. have never seen it since, but would like to
find out where it is available. ##<br /><br />it is amazing
how good something can be, but be in black and white, and h
ave zero special effects. in fact, amazing how much better s
omething like that is!
```

Using PCA:

```
watched this on k ##q ##ed, with frank baxter commenting ##,
as i recall ##. have never seen it since, but would like to
find out where it is available. ##<br /><br />it is amazing
how good something can be, but be in black and white, and h
ave zero special effects. in fact, amazing how much better s
omething like that is!
```

Using FFT:

```
watched this on k ##q ##ed, with frank baxter commenting ##,
as i recall ##. have never seen it since, but would like to
find out where it is available. ##<br /><br />it is amazing
how good something can be, but be in black and white, and h
ave zero special effects. in fact, amazing how much better s
omething like that is!
```

Figure 6: Computing  $C$  using SVD, PCA, and FFT yield eigenvectors with the same semantic role. Indeed, projections using different bases highlight various positive words in the same review.

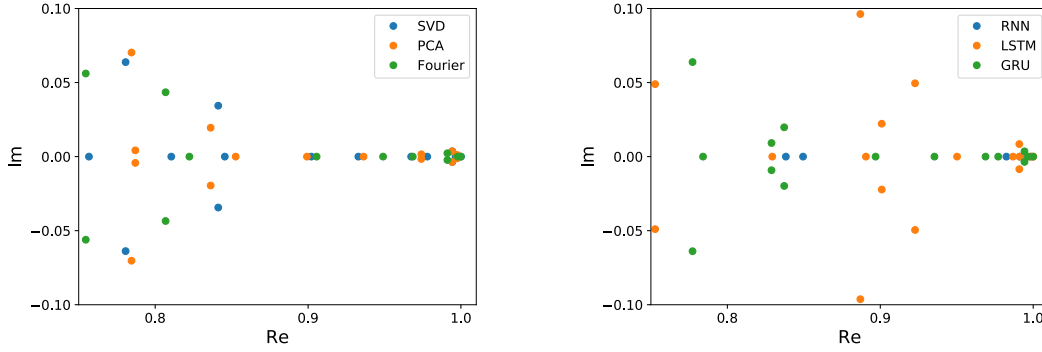

Figure 7: We show the dominant eigenvalues of various  $C$  matrices in the complex plane (Re, Im). Most of the eigenvalues correspond when different bases such as SVD, PCA, FFT are used (left). Similarly, using recurrent components such as RNN, LSTM, GRU leads to related spectra (right).

RNN model:

antonio ##ni with w ##im we ##nders - - ##some of the best of  
the best. story ##- character ##- ##visual ##s. like most of  
their works, it is not really aimed at the children or the  
childish. don't miss the genius contained in this one.

i am really at a loss as to how anyone could give this movie  
a 10 (or even more than a 2 ##!). it is full of bad lines,  
bad acting, bad slapstick, etc. i never thought i could see  
worse acting than the purposefully badly acted scenes at the  
beginning of uh ##f, but this was it, and just when you thi  
nk it can't possibly get any worse, it does ##! over and ove  
r again! you actually could have watched this in a theater #  
? it wasn't worth free on tv ##! my 4 ##- year- old and 1 ##-  
year- old liked it some, but they wanted to see the cat more  
and the cat was almost never on.

LSTM model:

watched this on k ##q ##ed, with frank baxter commenting ##,  
as i recall ##. have never seen it since, but would like to  
find out where it is available. ##<br /><br />it is amazing  
how good something can be, but be in black and white, and h  
ave zero special effects. in fact, amazing how much better s  
omething like that is!

it's really too bad that john candy wasted his skills on so  
many horrible films ( ##del ##ir ##ious, wagon ##s east, who  
's harry crumb ##?, etc.. this one has maybe a few chuckles,  
but it's mostly just really bad one-liners and dumb physica  
l stuff. let's honor this comedian ##'s memory by rememberin  
g things like planes, trains & automobile ##s and uncle buck  
.

Figure 8: Examples of highlighted unigrams obtained from the trained RNN and LSTM models.

**Results extend across architectures.** In addition to robustness to the basis, we also verify that our results qualitatively extend across different architectures. Specifically, we trained a vanilla recurrent neural network (RNN) (Elman, 1990), a long short term memory model (LSTM) (Hochreiter & Schmidhuber, 1997), and a gated recurrent unit (GRU) network on the sentiment analysis problem. Then, we extract a single batch from the test set, and evaluate our KANN approach on the trained models. We find that our analysis yields similar results in all cases. In particular, the dominant eigenvalues of each of the models attain related values as can be seen in Fig. 7 (right). Moreover, we find that the dominant eigenvectors share the same role of highlighting positive and negative unigrams. To verify this, we computed the histograms of identified positive and negative words as in Fig. 5. We observe that on average 62%, 76%, and 62% positive words are discovered by the projection magnitude of the RNN, LSTM, and GRU models. Similarly, the negative unigrams are highlighted in an average of 55%, 83%, and 74% for RNN, LSTM, and GRU. Indeed, there is a large variation in the statistics of the models, where LSTM obtains the best averages, followed by GRU, and RNN is last. Nevertheless, in all cases, the average identification of unigrams is above 50%, and given that BOW is noisy by itself, we believe these statistics are qualitatively similar. In addition, we plot in Fig. 8 a few examples of highlighted reviews obtained with the models.



## F RESULTS ON THE COPY TASK

The copy task was designed to test the memory retaining capabilities of recurrent units (Hochreiter & Schmidhuber, 1997). In this task, the network is expected to memorize the first few characters in the input array and copy them to the end of the output vector which is otherwise filled with blanks. For instance, the input-output structure reads  $928---:-- \mapsto_{\varphi} -----928$ , if the model is required to remember three digits across three blanks. Thus, the challenge increases with more digits to remember and when the amount of blanks is higher. We trained a `dtriv` architecture (Casado, 2019) on the copy task with three characters to remember and 30 blanks for 500 iterations. The `dtriv` model is similar to a vanilla RNN with the exception that its hidden-to-hidden transformation is *orthogonal*. The network converges to an accuracy of 100% on the training and test data as it is a relatively easy setting. The following analysis is based on a test batch of size 32, yielding a states tensor  $H \in \mathbb{R}^{32 \times 36 \times 48}$  where the middle dimension is the sequence length, and the last dimension is the hidden state size.

**The latent structure of the copy task is measure-preserving.** Our first analysis result deals with the geometric structure of the learnt dynamics. Before discussing our results, we make the following three observations. First, the copy problem with its unknown dynamics  $\varphi$  which maps inputs to outputs, is isometric. Indeed, for many choices of norms, e.g.,  $L^2$ , it follows that  $d(x_1, x_2) = d(y_1 = \varphi(x_1), y_2 = \varphi(x_2))$  where  $x_1, x_2$  are two input vectors, and  $y_1, y_2$  are two output vectors. Thus,  $\varphi$  belongs to the class of *measure-preserving* dynamical systems. Second, while `dtriv` uses orthogonal hidden-to-hidden matrices, the overall network transformation is not necessarily isometric due to the nonlinear activation layers. Indeed, the analysis in (Arjovsky et al., 2016) which also applies to `dtriv` only establishes an upper bound on the gradient norms, and there is no lower bound. In practice, since `dtriv` uses `modReLU` (Arjovsky et al., 2016), it may cause a non-isometric transformation to the latent space. Third, Koopman theory establishes a connection between the algebraic properties of the linear operator to the geometric structure of the dynamics as we show next. The following result is not novel (Eisner et al., 2015), but we prove it below for completeness.

**Proposition 1** *Let  $\varphi$  be an invertible measure preserving dynamical system on a compact, inner-product domain  $\mathcal{M}$ . Then its associated Koopman operator is unitary.*

**Proof.** Let  $\varphi : \mathcal{M} \rightarrow \mathcal{M}$  be a map on the compact, inner-product space  $\mathcal{M}$ . We denote by  $\mu$  the continuous measure on  $\mathcal{M}$ , and its induced metric  $\|z\|$ . The map  $\varphi$  is measure preserving, i.e.,  $\mu(\varphi^{-1}A) = \mu(A)$  for every measurable set  $A \subset \mathcal{M}$ . Let  $\mathcal{K}_{\varphi}$  be the Koopman operator of  $\varphi$  acting on the function space of square integrable function  $L^2$ . Given the indicator function  $1_A$  for the set  $A$ , we have that

$$\mathcal{K}_{\varphi} 1_A(z) = 1_A(\varphi \circ z) = 1_{\varphi^{-1}A}(z),$$

and thus

$$\int_{\mathcal{M}} \mathcal{K}_{\varphi} 1_A d\mu = \mu(\varphi^{-1}A) = \mu(A) = \int_{\mathcal{M}} 1_A d\mu.$$

Moreover, positive functions converge to a representation using simple indicator functions. Consequently, we have that  $\int_{\mathcal{M}} \mathcal{K}_{\varphi} f d\mu = \int_{\mathcal{M}} f d\mu$  for general  $f \in L^2$  since it can be written as the difference of the integrable negative and positive components of  $f$ .

The Koopman operator is linear and it is pointwise multiplicative, i.e.,  $\mathcal{K}_{\varphi}(\alpha f + \beta g) = \alpha \mathcal{K}_{\varphi}(f) + \beta \mathcal{K}_{\varphi}(g)$  and  $\mathcal{K}_{\varphi}(fg) = \mathcal{K}_{\varphi}(f)\mathcal{K}_{\varphi}(g)$ , where  $\alpha, \beta \in \mathbb{R}$ , and  $f, g \in L^2$ . Due to these observations, it follows that  $\mathcal{K}_{\varphi}$  preserves the inner product of functions, namely, for every  $f, g \in L^2$

$$\langle f, g \rangle = \int_{\mathcal{M}} f g d\mu = \int_{\mathcal{M}} \mathcal{K}_{\varphi}(f g) d\mu = \langle \mathcal{K}_{\varphi}(f), \mathcal{K}_{\varphi}(g) \rangle.$$

Thus, the Koopman operator in this case is an isometry, since

$$d(f, g) = \|f - g\| = \langle f - g, f - g \rangle^{\frac{1}{2}} = \langle \mathcal{K}_{\varphi}(f - g), \mathcal{K}_{\varphi}(f - g) \rangle^{\frac{1}{2}}.$$

Finally, if  $\varphi$  is invertible then  $\mathcal{K}_{\varphi}^* \mathcal{K}_{\varphi} = \mathcal{K}_{\varphi} \mathcal{K}_{\varphi}^*$  where  $\mathcal{K}_{\varphi}^*$  is the adjoint operator, and thus  $\mathcal{K}_{\varphi}$  is unitary.



Given  $H$  as specified above and its corresponding  $C$ , we find that  $C$  is approximately orthogonal, i.e.,  $C^T C \approx \text{id}$ . Specifically, the relative error  $|C^T C - \text{id}|^2 / |C|^2 = 0.0625$ . Our findings align with prior work (Rustamov et al., 2013) which shows that approximate Koopman operators are approximately orthogonal for measure-preserving maps. Therefore, although  $\text{dtriv}$  is not guaranteed to learn a measure-preserving latent map, it does so in practice as our method reveals.

**Eigenvectors span multiple digits in the copy task.** Our second analysis result on the copy problem focuses on the eigendecomposition of  $C$ . We find that most of the eigenvalues, 44 out of 47, are approximately unit length, i.e.,  $|\lambda_j - 1| < 5e-2$ , which also reinforces the above findings. Based on Eq. (9) it follows that the eigenvectors of those eigenvalues have long memory horizons, e.g.,  $\tau = 418$  for  $\epsilon = 1e-1$ . This is well beyond the required memory horizon for this task which is 30 as the number of blanks. Additionally, we find that all eigenvectors have the capacity to represent several characters, depending on the root of unity they are multiplied with. Namely, computing the output of the state  $\tilde{h} = \text{Re}(z v_j)$  for several  $z$  values, yields various digits. For instance, the inset shows a specific eigenvector and its associated digits with their respective span of the unit ball. We also plot in shaded dots the coefficients of a particular input over time. Evidently, the shown eigenvector is responsible to output the blank part of the output since the coefficients are located in the zero regime. Qualitatively similar results were obtained for the other eigenvectors as we show in Fig. 9 the sets of digits for select eigenvectors. For instance,  $v_6$  spans the digits  $\{0, 5, 7\}$ , depending on the root of unity  $z_i$  we multiply with  $v_6$ . Thus, the network essentially splits the latent space onto digit regions. Then, given an input such as  $928---:--$ , the network generates its latent trajectory by carefully scaling the eigenvectors to point to the required output for every time sample.

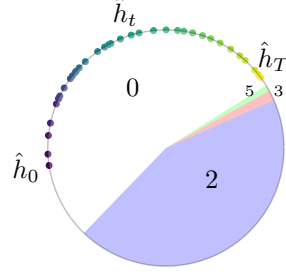

**Quantitative results on the copy task.** We briefly recall that  $\text{RENN}$  uses the hidden state tensor  $H$  to generate a set of fixed points, i.e., points  $h^*$  for which the dynamical system  $h_t = F(h_{t-1}, x_t)$  is stationary  $h^* \approx F(h^*, 0)$  (Sussillo & Barak, 2013). Then, they derive their analysis using the input and recurrent Jacobians of  $F$ ,  $\mathcal{J}^{\text{inp}}$  and  $\mathcal{J}^{\text{rec}}$ , evaluated at a single point  $(h^*, x^* \equiv 0)$ . We show in Fig. 10 the resulting Jacobian matrices using  $\text{RENN}$  where  $\mathcal{J}^{\text{rec}} \approx \text{id}$  matrix (left). This is actually the expected result—as the blanks are mapped to zeros in this task, using  $x^* \equiv 0$  means we look for fixed points  $h^*$  related to a blank input. However, the output for a blank input should be blank as well, and thus the hidden states converge to a section of the manifold which is indifferent to the inputs. Indeed, in (Sussillo & Barak, 2013; Maheswaranathan & Sussillo, 2020; Maheswaranathan et al., 2020), the authors discuss approaches to select input dependent initial points  $x^*$ , however, it remains unclear how to avoid the above issue since any chosen point is related to a particular potential input. For reference and comparison, we show in Fig. 10 (middle) the algebraic structure of our  $C$  matrix.

To assess the information encoded in  $\mathcal{J}^{\text{rec}}$  and  $\mathcal{J}^{\text{inp}}$  vs.  $C$ , we perform the following experiment. Let  $\{h_t\}$  denote the nonlinear path of hidden states obtained from the copy task network. Given a

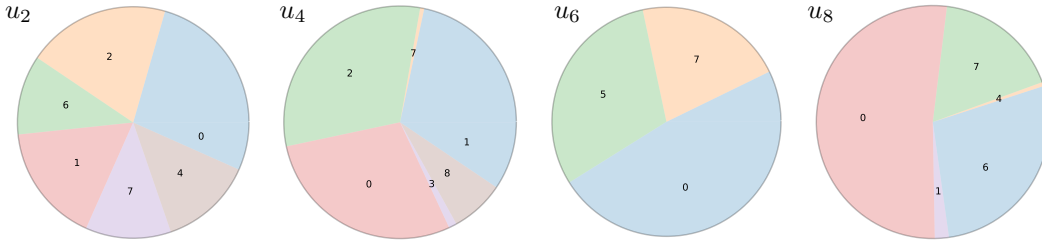

Figure 9: Every eigenvector in the copy task span multiple characters in the alphabet, allowing it contribute to the propagation of the initial digits over the sequence.

certain threshold  $l = 1, \dots, T$ , we split the path to two segments  $\{h_t\}_{t=1}^l$  and  $\{B C^k \tilde{h}_l\}_{k=1}^{T-l}$ . That is, the first segment is simply the original states, and the second segment includes linear predictions with  $C^k$  while always using  $h_l$ . We denote by  $H_l^{\text{KANN}}$  the union of the paths, i.e.,

$$H_l^{\text{KANN}} = \{h_1, \dots, h_l, B C \tilde{h}_l, \dots, B C^{T-l} \tilde{h}_l\}. \quad (3)$$

For every admissible  $l$ , we generate  $H_l^{\text{KANN}}$ , and we compute the accuracy obtained by the network using the path  $H_l^{\text{KANN}}$ . Fig. 10 (right) shows in blue the accuracy for the nonlinear path which is simply 100%. We show in orange the accuracy obtained for several  $l/T$  values. The accuracy results of KANN are extremely good, even when the percentage is high, i.e., most of the path does *not* use the states provided by the network, but rather, their linear prediction. Further, we emphasize that the orange point marks the percentage for three hidden states. That is, our method gets more than 80% accuracy exactly when all the non-blank input digits are implicitly available in the states. Therefore, our results highlight that  $C$  truly mimics the nonlinear dynamics as it is the minimal set of necessary inputs for a meaningful prediction.

In comparison, RENN can be used in a similar fashion to generate  $H_l^{\text{RENN}}$  using the following formula

$$h_{t+1}^{\text{RENN}} := h^* + \mathcal{J}^{\text{rec}}(\bar{h}_t - h^*) + \mathcal{J}^{\text{inp}} x_t \quad (4)$$

$$\approx \bar{h}_t + \mathcal{J}^{\text{inp}} x_t, \quad (5)$$

where  $\bar{h}_t$  can be the original  $h_t$  or  $h_t^{\text{RENN}}$  depending on  $l$ , and the bottom formula is relevant when  $\mathcal{J}^{\text{rec}} \approx \text{id}$  matrix. The green curve in Fig. 10 shows the accuracy results of RENN. Due to the trivial nature of  $\mathcal{J}^{\text{rec}}$ , RENN achieves zero accuracy in most cases, and it significantly improves when the last three states become available (marked by the green point). Thus, RENN requires almost the entire sequence of ground-truth hidden states to produce good accuracy measures in this scenario.

## G TRAINING INFORMATION

In Tab. 3 we add details regarding the models training process across each architecture and task. In the tasks column, SA, ECGC, and CT are acronyms for Sentiment Analysis, ECG Classification, and Copy Task, respectively. In addition, we used weight decay regularization in both ECG classification and Sentiment Analysis tasks.

## REFERENCES

- Martín Arjovsky, Amar Shah, and Yoshua Bengio. Unitary evolution recurrent neural networks. In *International Conference on Machine Learning*, volume 48, pp. 1120–1128, 2016.
- Mario Lezcano Casado. Trivializations for gradient-based optimization on manifolds. In *Advances in Neural Information Processing Systems*, pp. 9154–9164, 2019.

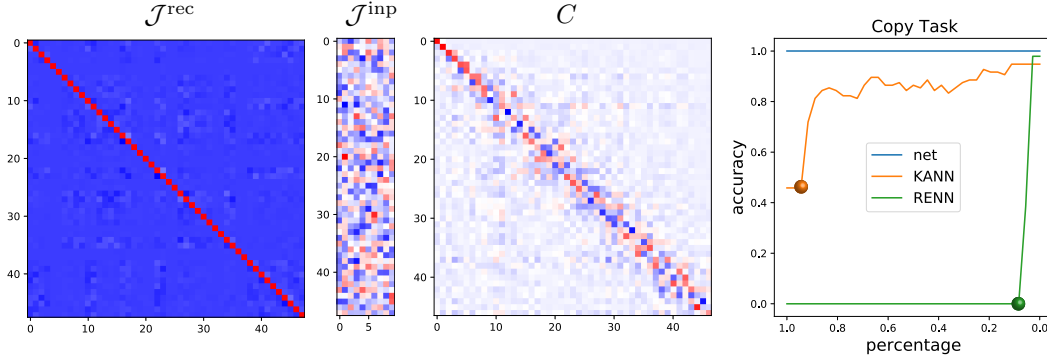

Figure 10: Computing RENN components for the copy task leads to an almost identity recurrent Jacobian,  $|\mathcal{J}^{\text{rec}} - \text{id}| = 0.11$  relative error. In comparison, our matrix  $C$  is approximately orthogonal and it exhibits a diagonally-dominant structure. Our KANN approach attains good accuracy results when used to predict the states path. See the text.

Table 3: The following hyperparameters per task and model were used during training.

| Task | Architecture | #epochs | #units | Optimizer | LR   | LR Scheduler           | Clip |
|------|--------------|---------|--------|-----------|------|------------------------|------|
| SA   | RNN          | 7       | 128    | Adam      | 5e-3 | ExpLR, $\gamma = 0.6$  | 15   |
| SA   | GRU          | 5       | 256    | Adam      | 5e-3 | ExpLR, $\gamma = 0.5$  | 15   |
| SA   | LSTM         | 5       | 256    | Adam      | 1e-3 | ExpLR, $\gamma = 0.3$  | 5    |
| ECGC | GRU          | 150     | 64     | Adam      | 1e-3 | –                      | –1   |
| ECGC | LSTM         | 150     | 64     | Adam      | 1e-3 | –                      | –1   |
| CT   | dtriv        | 500     | 48     | RMSprop   | 1e-3 | –                      | –1   |
| CT   | RNN          | 10k     | 64     | RMSprop   | 5e-3 | ExpLR, $\gamma = 0.85$ | 5    |
| CT   | GRU          | 285     | 48     | RMSprop   | 1e-2 | –                      | –1   |
| CT   | LSTM         | 6.5k    | 48     | RMSprop   | 5e-3 | –                      | 10   |

Tanja Eisner, Bálint Farkas, Markus Haase, and Rainer Nagel. *Operator theoretic aspects of ergodic theory*, volume 272. Springer, 2015.

Jeffrey L Elman. Finding structure in time. *Cognitive science*, 14(2):179–211, 1990.

Sepp Hochreiter and Jürgen Schmidhuber. Long short-term memory. *Neural computation*, 9(8):1735–1780, 1997.

Niru Maheswaranathan and David Sussillo. How recurrent networks implement contextual processing in sentiment analysis. *arXiv preprint arXiv:2004.08013*, 2020.

Niru Maheswaranathan, Alex Williams, Matthew Golub, Surya Ganguli, and David Sussillo. Reverse engineering recurrent networks for sentiment classification reveals line attractor dynamics. In *Advances in Neural Information Processing Systems*, pp. 15696–15705, 2019.

Niru Maheswaranathan, David Sussillo, Luke Metz, Ruoxi Sun, and Jascha Sohl-Dickstein. Reverse engineering learned optimizers reveals known and novel mechanisms. *arXiv preprint arXiv:2011.02159*, 2020.

Raif M Rustamov, Maks Ovsjanikov, Omri Azencot, Mirela Ben-Chen, Frédéric Chazal, and Leonidas Guibas. Map-based exploration of intrinsic shape differences and variability. *ACM Transactions on Graphics (TOG)*, 32(4):1–12, 2013.

David Sussillo and Omri Barak. Opening the black box: low-dimensional dynamics in high-dimensional recurrent neural networks. *Neural computation*, 25(3):626–649, 2013.
